# Supplementary material for: Rhomboid protease RHBDL4 promotes retrotranslocation of aggregation-prone proteins for degradation
Source: PubMed Central journal article supplement — Cell Rep. Author manuscript; Available in PMC 2022 Sep 2. (PMC9437926; doi:10.1016/j.celrep.2022.111175), 2022-08-09
Supplement: NIHMS1830656-supplement-1.pdf [file NIHMS1830656-supplement-1.pdf]

**Cell Reports, Volume 40**

**Supplemental information**

**Rhomboid protease RHBDL4 promotes  
retrotranslocation of aggregation-prone  
proteins for degradation**

**Josephine Bock, Nathalie Kühnle, Julia D. Knopf, Nina Landscheidt, Jin-Gu Lee, Yihong Ye, and Marius K. Lemberg**

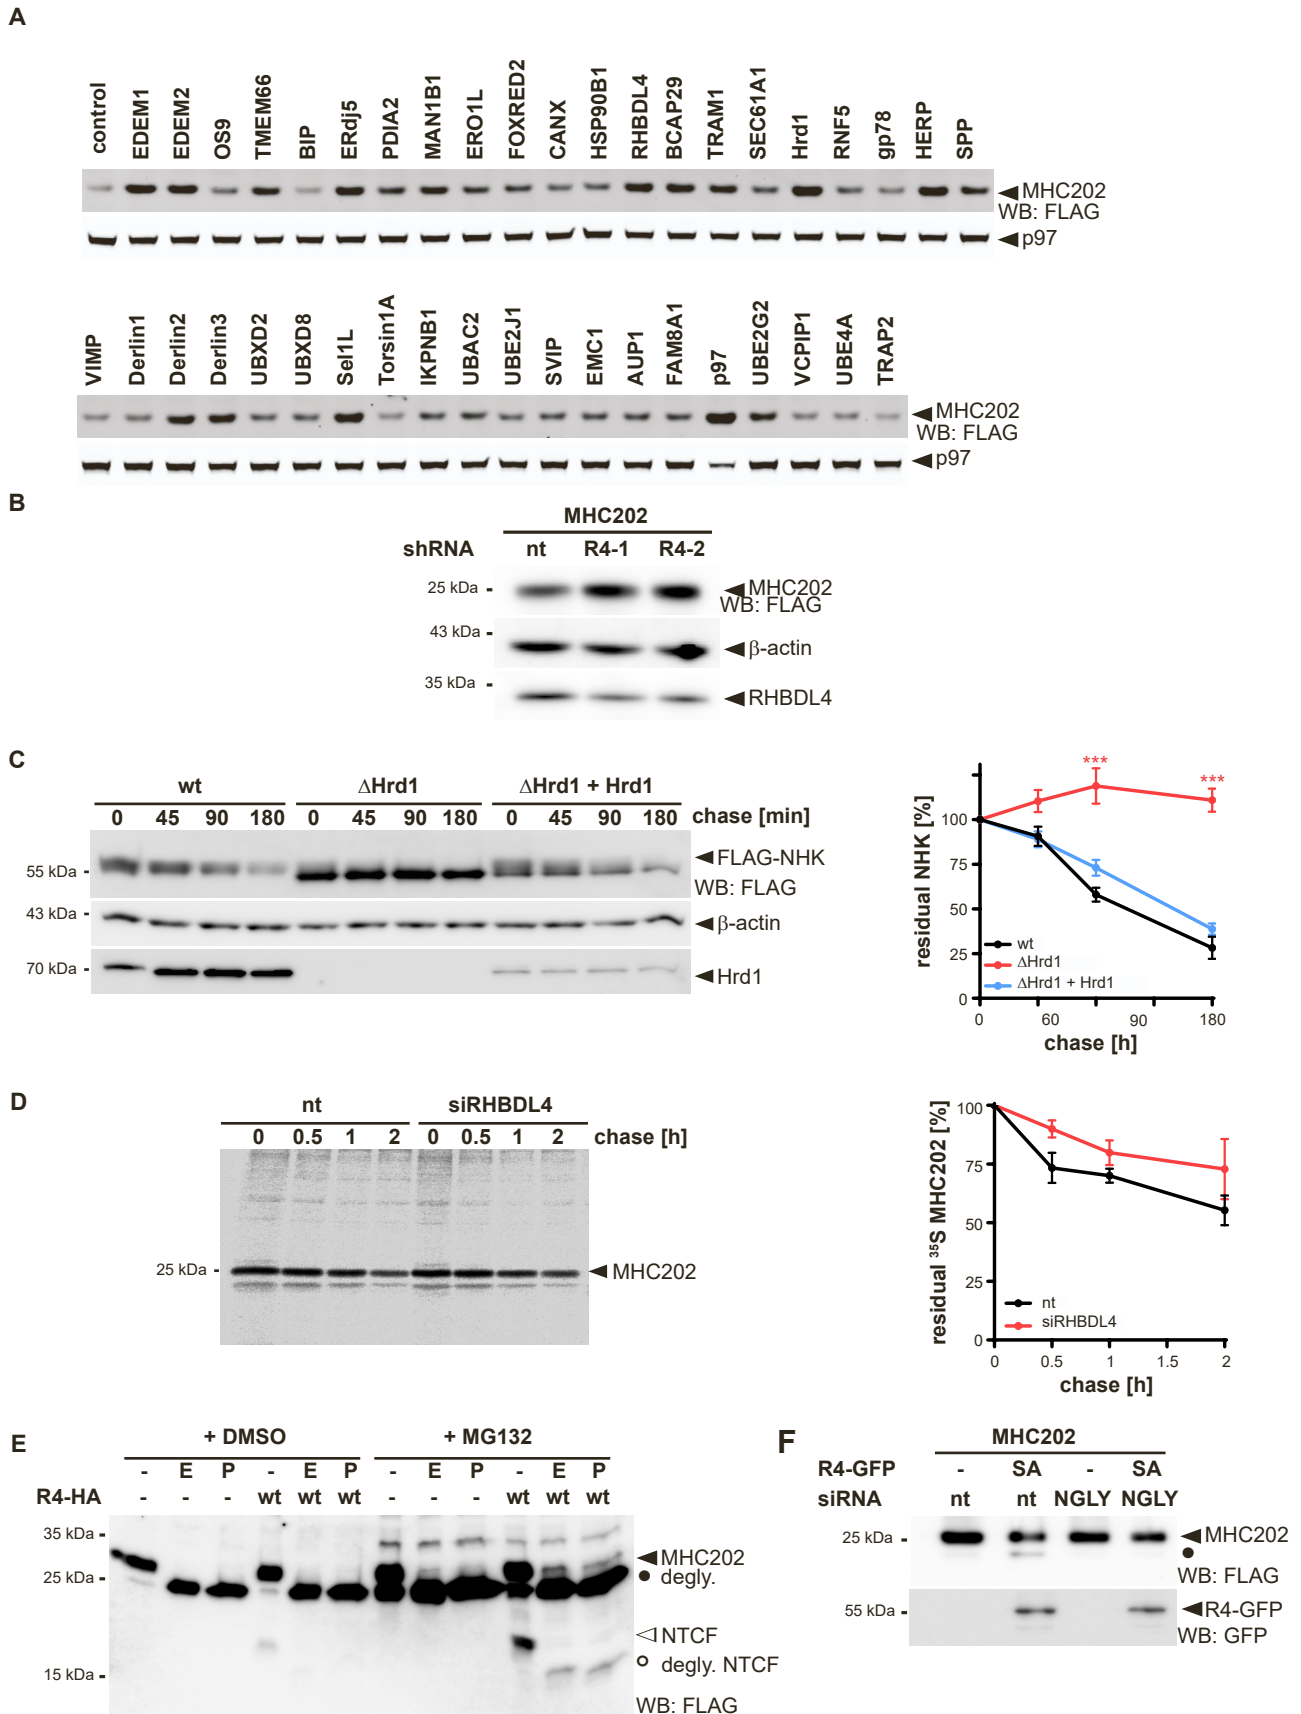

**Figure S1. MHC202 is degraded by a concerted action of the Hrd1 complex and RHBDL4. Related to Figure 1.**

(A) Influence of selected ERAD components on the steady-state level of MHC202 shown by western blot (WB) of lysates from siRNA transfected cells detecting the C-terminal FLAG tag. p97 was used as both positive and loading control. Knockdown efficiency of the siRNA screen was not determined and quantification of MHC202 steady-state level was not normalized to the loading control p97.

(B) RHBDL4 knockdown with two independent shRNAs (R4-1 and R4-2) in Hek293T cells leads to an increase of MHC202 steady-state level when compared to a non-targeting (nt) control shRNA.  $\beta$ -actin was used as a loading control.

(C) N-terminal FLAG-tagged NHK is stabilized in Hrd1 knockout cells ( $\Delta$ Hrd1) compared to parental Hek293T cells (wt). Co-expression of FLAG-NHK and Hrd1 rescues the degradation defect in  $\Delta$ Hrd1 cells.  $\beta$ -actin is used as a loading control. WB quantification of three independent experiments is shown in the right panel (means  $\pm$  SEM,  $n=3$ , \*\*\* $p \leq 0.001$  (two-way ANOVA)).

**(D)** siRNA knockdown of RHBDL4 delayed MHC202 degradation in Hek293T cells compared to the non-targeting siRNA control in metabolic pulse label chase. The right panel shows the quantification of autoradiograms of three independent experiments (means  $\pm$  SEM, n=2).

**(E)** MHC202 (filled triangle) and its 18 kDa N-terminal fragment (NTCF) generated by ectopically expressed HA-tagged RHBDL4 (R4-HA) are glycosylated as shown by sensitivity to Endo H (E) and PNGase (P). Degly., deglycosylated full-length MHC202; Degly. NTCF, deglycosylated N-terminal cleavage fragment. Samples, as shown in Figure 1D, either treated with vehicle control (DMSO) or MG132 (2  $\mu$ M).

**(F)** Stabilization of the unglycosylated form of MHC202 by the catalytic inactive mutant of RHBDL4 (SA-GFP) is abolished upon knockdown of N-glycanase (NGLY) when compared to nt control.

Data information: For clarity, for panels B-F representative experiments of three independent biological replicates are shown.

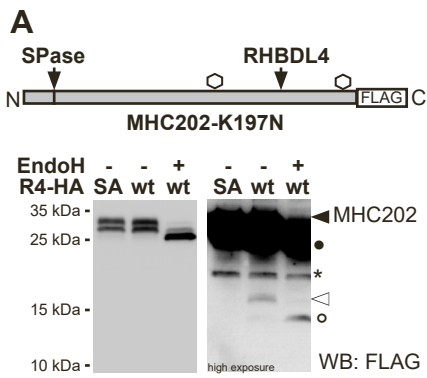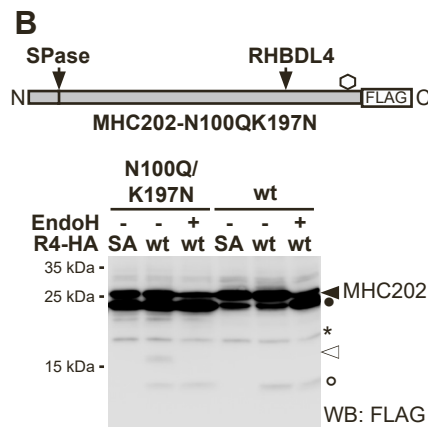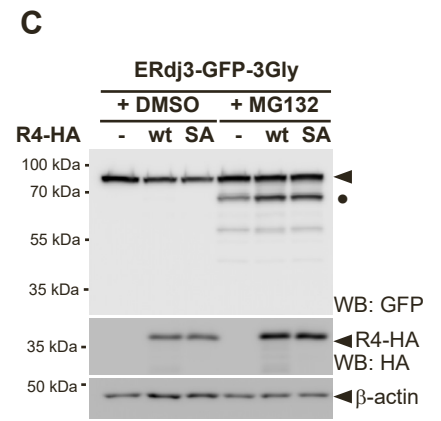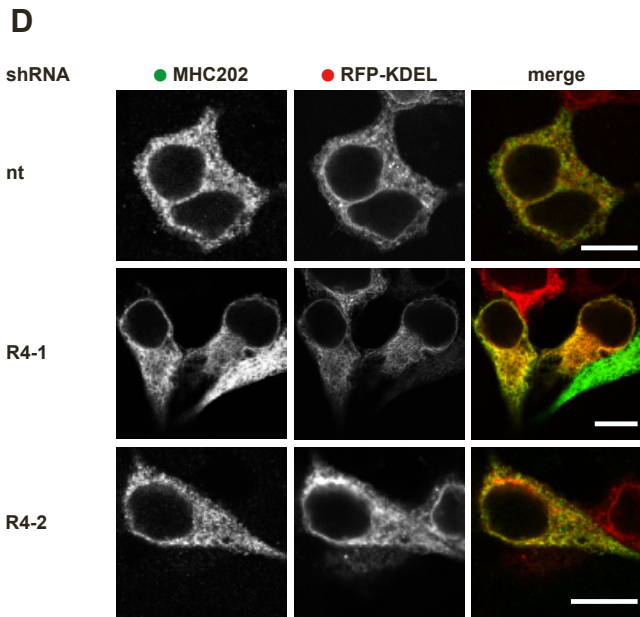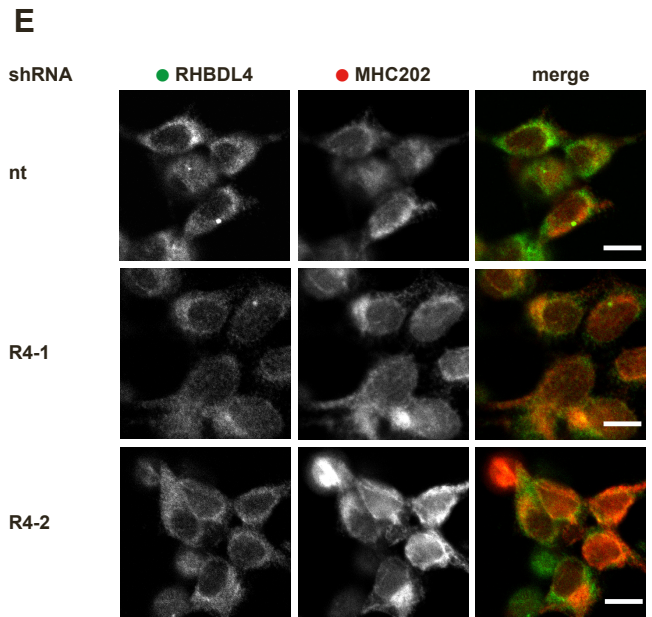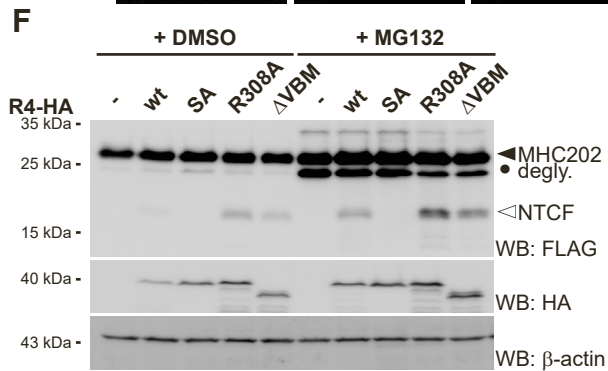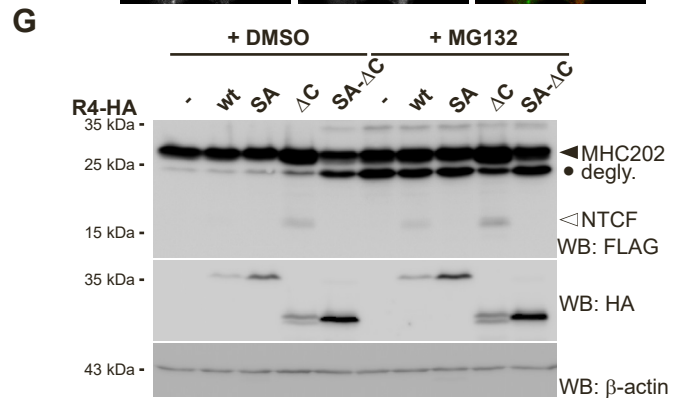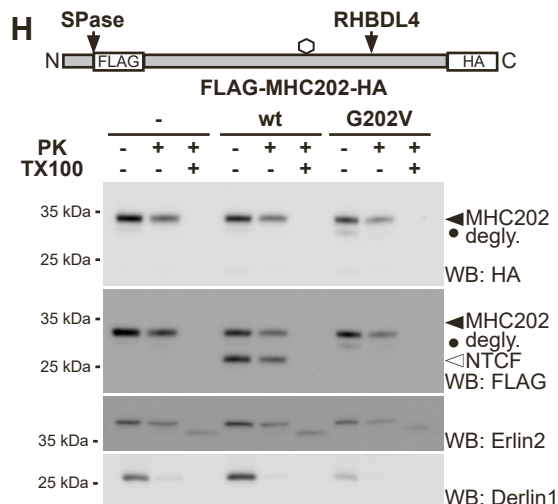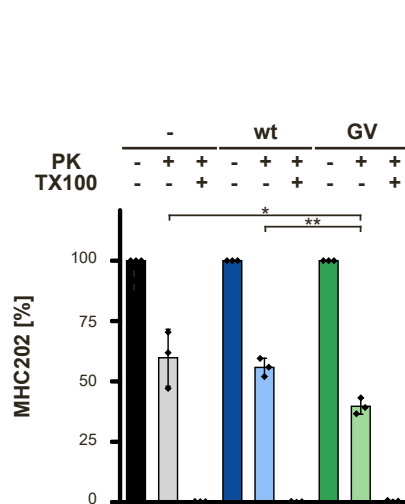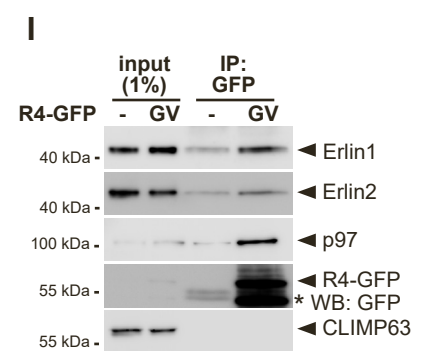

**Figure S2. RHBDL4 knockdown leads to accumulation of MHC202 in the ER. Related to Figure 2.**

- (A)** RHBDL4 cleaves C-terminally FLAG-tagged MHC202 with an additional C-terminal glycosylation site (K197N) post-translocational as shown by the sensitivity of the C-terminal fragment to Endo H (open triangle and open circle). Asterisk, unspecific band; filled circle, deglycosylated full-length MHC202; R4-HA, HA-tagged RHBDL4; hexagon, site for N-linked glycosylation; SPase, signal peptidase; WB, western blotting.
- (B)** RHBDL4 cleaves MHC202 lacking the native glycosylation site (N100Q) with a single glycosylation site (K197N) in the C-terminal portion leading to an Endo H-sensitive and a partially deglycosylated fragment (open triangle and open circle). Asterisk unspecific band; filled circle, deglycosylated full-length MHC202; hexagon, site of N-linked glycosylation; SPase, signal peptidase.
- (C)** RHBDL4 does not cleave ERdj3-GFP-3Gly (filled triangle). Deglycosylated ERdj3-GFP-3Gly (filled circle) is stabilized upon proteasomal inhibition by MG132 (2  $\mu$ M).  $\beta$ -actin was used as a loading control.
- (D)** Knockdown of RHBDL4 with two independent shRNAs (R4-1, R4-2) leads to MHC202 accumulation in the ER as shown by colocalization with RFP-KDEL; nt, non-targeting control shRNA; scale bar, 10  $\mu$ m.
- (E)** Knockdown of RHBDL4 with two independent shRNAs (R4-1, R4-2) increases MHC202 signal in stable T-REx Hek293T cell expressing FLAG-tagged MHC202, when compared to nt control shRNA; scale bar, 10  $\mu$ m.
- (F)** The N-terminal cleavage fragment (NTCF) of C-terminally FLAG-tagged MHC202 generated by the HA-tagged RHBDL4-R308A mutant is stabilized in the absence of proteasome inhibitor MG132 (2  $\mu$ M). Similarly, co-expression of an RHBDL4 mutant lacking the binding motif for p97 ( $\Delta$ VBM) together with MHC202 results in stabilization of the N-terminal cleavage fragment. Impaired p97 interaction of RHBDL4 leads to a slightly reduced steady-state level of deglycosylated unprocessed MHC202 form (degly.).  $\beta$ -actin was used as a loading control.
- (G)** HA-tagged RHBDL4 mutant lacking the C-terminal domain ( $\Delta$ C) cleaves FLAG-tagged MHC202 and stabilizes the deglycosylated unprocessed form of MHC202 even in the absence of proteasome inhibitor MG132 (2  $\mu$ M).  $\beta$ -actin was used as a loading control.
- (H)** The accessibility of MHC202 to exogenous proteinase K (PK) was analyzed in ER-derived microsomes. Hek293T cells were co-transfected with double-tagged MHC202 and either an empty vector (-), RHBDL4 wt, or the RHBDL4-G202V mutant (G202V). Hek293T-derived microsomes were incubated with PK in the presence and absence of 1 % TritonX-100 (TX100). The R4-induced MHC202 cleavage fragment was protected from exogenous PK, whereas full-length MHC202 was partially accessible. Erlin2 (epitope in ER lumen) and Derlin1 (epitope in cytosol) were used as controls. Degly., deglycosylated full-length MHC202. HA signals of three independent experiments were quantified and shown in the right panel (means  $\pm$  SEM, n=3, \*p  $\leq$  0.05; \*\*p  $\leq$  0.01 (Student's t-test)).
- (I)** GFP-tagged RHBDL4-G202V (R4GV-GFP) interacts with endogenous p97, Erlin1 and -2, but not CLIMP63 which was used as a negative control. Asterisk indicates unspecific band.
- Data information: For clarity, for all panels representative experiments of three independent biological replicates are shown.

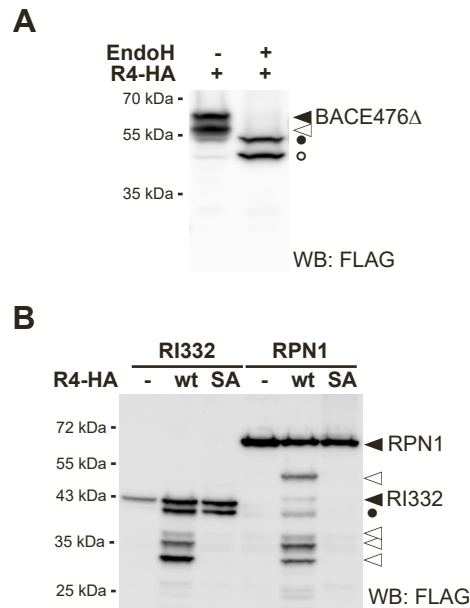

**Figure S3. RHBDL4-catalyzed cleavage of BACE476 $\Delta$  generates a glycosylated N-terminal fragment. Related to Figure 3.**  
**(A)** BACE476 $\Delta$  (filled triangle) and its HA-tagged RHBDL4 (R4-HA) generated N-terminal fragment (open triangle) are glycosylated as shown by sensitivity to Endo H (filled and open circles). WB, western blotting.  
**(B)** Hek293T cells were co-transfected either with RI332 or RPN1 and an empty vector (-), R4-HA wild type (wt), or the catalytic inactive SA mutant. RHBDL4 generates several N-terminal cleavage fragments (open triangles). Expression of the catalytic mutant stabilizes the 40-kDa deglycosylated full-length RI332 (filled circle) even in the absence of the proteasome inhibitor MG132 (2  $\mu$ M).

Data information: For clarity, for all panels representative experiments of three independent biological replicates are shown.

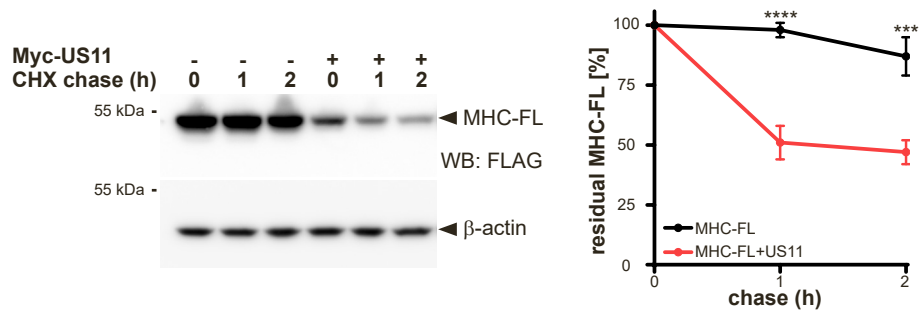

**Figure S4. US11 increases turnover of MHC-FL. Related to Figure 4.**

Hek293T cells were transfected with MHC-FL with or without Myc-tagged US11. 24 h post-transfection cycloheximide (CHX) was added, and cells were harvested at indicated time points (means  $\pm$  SEM, n=4; \*\*\*p  $\leq$  0.001, \*\*\*\*p  $\leq$  0.0001 (two-way ANOVA)). A representative experiment of three independent biological replicates is shown. WB, western blotting.

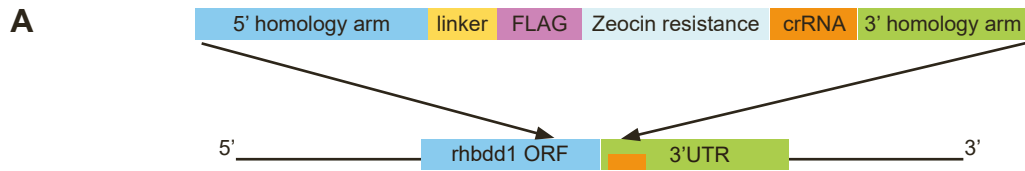

**B**

RHBDL4/Rhbdd1 chromosom 2 exon 7

P P Y G F H L S P E E M R R Q R L H R F D S  
 CCACCCTACGGGTTTCATCTCTCACCAGAAGAAATGAGGAGACAGCGGCTTCACAGATTTCGATAGC  
 Q S G G G G S G G G G S D Y K D D D D K \*  
 CAGTCAGGTGGAGGAGGTAGTGGCGGAGGCGGATCCGATTACAAGGATGACGATGACAAGTAG

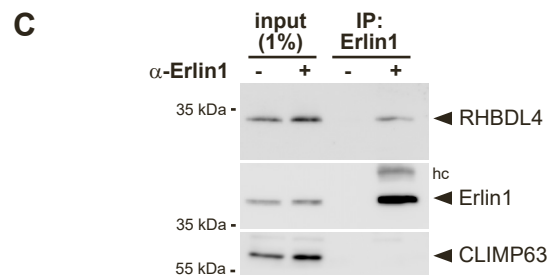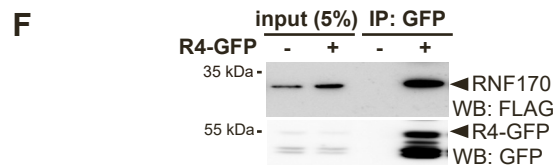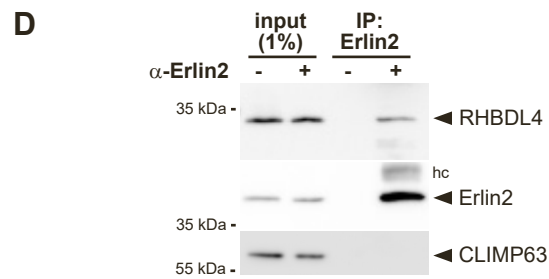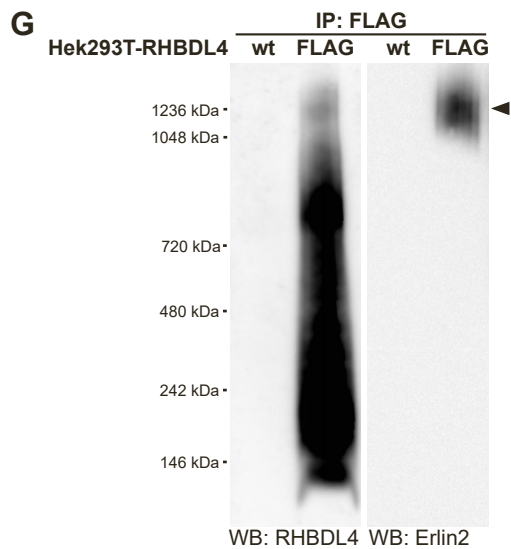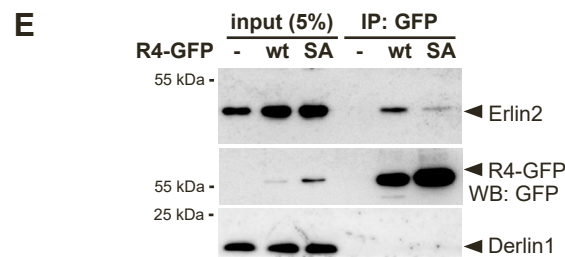

**H**

Erlin2 chromosome 8, exon 2

wt AGTTTCTTTTGTGCATCTCTCTTCTCAGCTGTGCACAAGATAGAGAGGGACATATTTGGGGTATATTACAGGTAAGGCAGAGAC  
 allele 1 AGTTTCTTTTGTGCATCTCTCTTCTCAGCTGTGCACAAGAT-----GGACATATTGGGGTATATTACAGGTAAGGCAGAGAC  
 allele 2 AGTTTCTTTTGTGCATCTCTCTTCTCAGCTGTGCACAAGATAG----GGGACATATTGGGGTATATTACAGGTAAGGCAGAGAC  
 allele 3 AGTTTCTTTTGTGCATCTCTCTTCTCAGCTGTGCACAAGATAG-----CATATTGGGGTATATTACAGGTAAGGCAGAGAC

**I**

Erlin1 chromosom 10 exon 3

intron 2-3 G G A L L T S P S G P G Y H I M L P  
 CTTTTTGGCAGGGGAGGAGCTTTACTAAGTACCCAGTGGACCAGGCTATCATATCATGTTGCCT  
 F I T T F R S V S G G G G S G G G G S \* \*  
 TTCATTACTACGTTTCAGATCTGTGTCAGGTGGAGGAGGTAGTGGCGGAGGCGGATCC TAGTGA

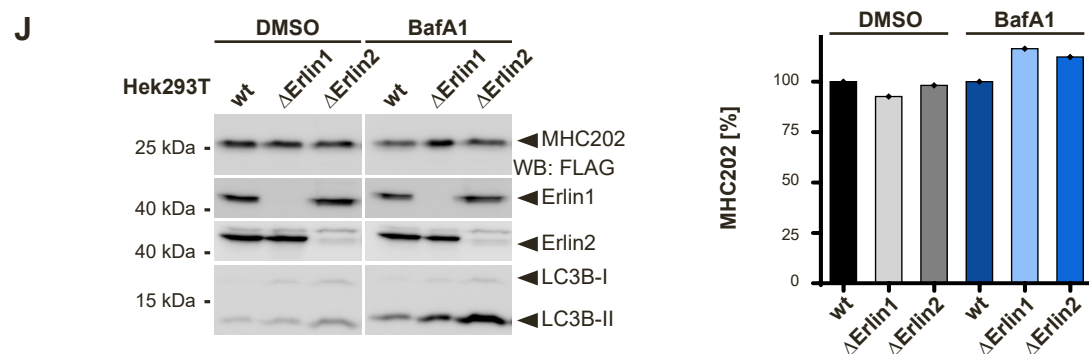



**Figure S5. RHBDL4 interacts with Erlin1, Erlin2 and RNF170. Related to Figure 5.**

- (A) Outline of the applied tagging strategy of RHBDL4 (referred to by its gene name *Rhbdd1*) according to (Fueller et al., 2020).
- (B) Sanger sequencing of chromosomal DNA obtained from the Hek293T-R4-FLAG cell lines shows the insertion of the FLAG tag in the last coding exon. Color code as in (A).
- (C) Microsomes from Hek293T cells were solubilized with 1% Triton X-100, and endogenous Erlin1 was isolated by immunoprecipitation (IP). Western blot (WB) identifies co-purification of endogenous RHBDL4. Hc, heavy chain.
- (D) Microsomes from Hek293T cells were solubilized with 1% Triton X-100, and endogenous Erlin2 was isolated by IP. WB identifies co-purification of endogenous RHBDL4. Hc, heavy chain.
- (E) Hek293T cells were transfected with empty vector, RHBDL4-GFP or catalytic inactive RHBDL4-SA-GFP (SA). Following solubilization with Triton X-100, R4-GFP was isolated by IP using an anti-GFP antibody. Endogenous Erlin2 binds more efficiently to R4-GFP wild type (wt) than to its catalytic inactive SA mutant. Derlin1 was used as a negative control.
- (F) Co-immunoprecipitation experiment as in (C) using Hek293T cells transfected with RNF170-FLAG.
- (G) Endogenous RHBDL4 is part of an MDa-sized erlin complex. Hek293T wt cells or cells with chromosomally FLAG-tagged RHBDL4 (FLAG) were solubilized with 1% Triton X-100, immunoprecipitated for FLAG, eluted with FLAG peptides and analyzed by BN-PAGE. RHBDL4-FLAG formed several higher molecular weight complexes in addition to the 1.2 MDa complex containing Erlin2 (filled triangle).
- (H) Sanger sequencing of genomic DNA obtained from Hek293T  $\Delta$ Erlin2 knockout cells. Single-guide RNA-binding site is underlined; protospacer-associated motif is shown in bold.
- (I) Sanger sequencing of genomic DNA obtained from Hek293T  $\Delta$ Erlin1 knockout cells show the insertion of the Stop cassette in exon 3. Color code as in (A). Erlin1/Erlin2 double knockout cells were generated accordingly using the Erlin2 knockout cells in (H).
- (J) Steady-state levels of MHC202 are reduced in Hek293T Erlin1 ( $\Delta$ Erlin1) and Erlin2 ( $\Delta$ Erlin2) knockout cells compared to wt Hek293T cells. Lysosomal inhibition by BafA1 increases stabilization of MHC202 caused by single knockout of Erlin1 and Erlin2 (n=1).

Data information: For clarity, for panels C-G representative experiments of three independent biological replicates are shown.

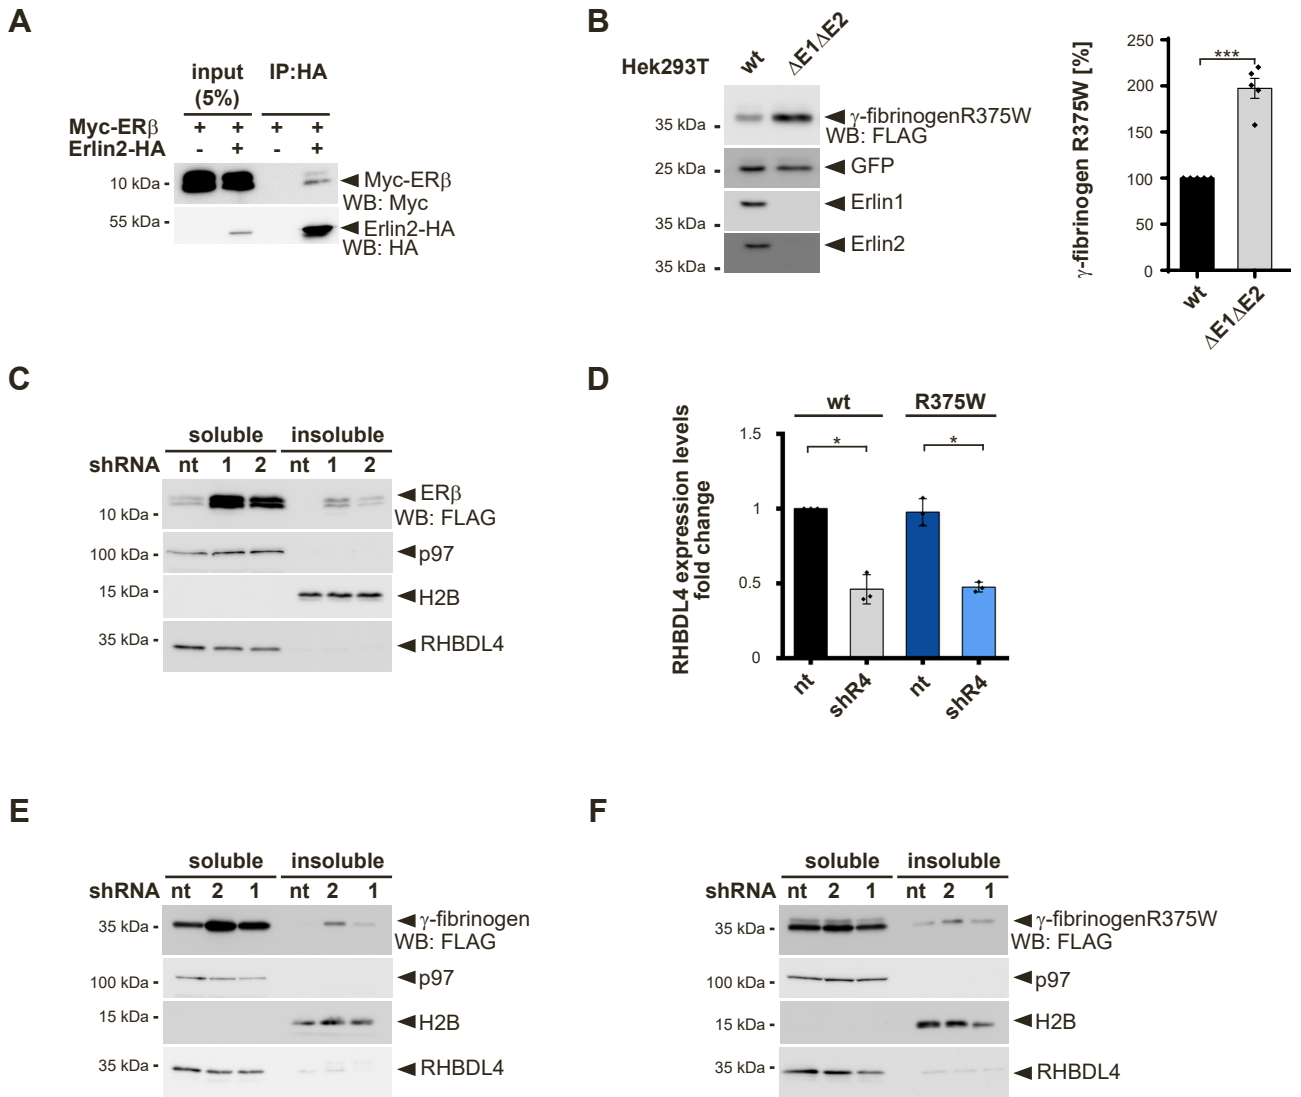

**Figure S6. The RHBDL4-erlin complex interacts with aggregation-prone proteins. Related to Figure 6.**

(A) Western blotting (WB) after immunoprecipitation (IP) of Erlin2-HA from Triton X-100 solubilized Hek293T cells confirms interaction with ERβ as has been shown previously (Vincenz-Donnelly et al., 2018).

(B) Steady-state levels of γ-fibrinogen R375W mutant increase in Erlin1/Erlin2 Hek293T double knockout cells (ΔE1ΔE2) in comparison to parental wild-type Hek293T cells (wt). GFP was used as a loading control. Right panel, WB quantification of γ-fibrinogen R375W (means ± SEM, n=5, \*\*\*p≤ 0.001 (Student's t-test)).

(C) ERβ steady-state levels increase in Hek293T cells transfected with two independent shRNAs targeting RHBDL4 (R4-1 and R4-2) compared to non-targeting control (nt). Knockdown of RHBDL4 further increases the recovery of ERβ in the NP40 insoluble fraction. p97 was used as a loading control for the soluble fraction and H2B for the insoluble fraction.

(D) Transcriptional levels of RHBDL4 are reduced upon knockdown of RHBDL4 (shR4) compared to cells co-transfected with nt control and γ-fibrinogen wt or R375W mutant. (means ± SEM, n=3, \*p≤ 0.05, \*\*p≤ 0.01 (Student's t-test)).

(E) γ-fibrinogen steady-state levels increase in Hek293T cells transfected with two independent shRNAs targeting RHBDL4 (R4-1 and R4-2) compared to cell treated with nt control in Hek293T cells. Knockdown of RHBDL4 further increases the recovery of γ-fibrinogen in the NP40 insoluble fraction. p97 was used as a loading control for the soluble fraction and H2B for the insoluble fraction.

(F) Assay as shown in (E) analyzing the steady-state levels of the γ-fibrinogen R375W mutant. Knockdown of RHBDL4 further increases the recovery of γ-fibrinogen R375W in the NP40 insoluble fraction. p97 was used as a loading control for soluble fraction and H2B for insoluble fraction, respectively.

Data information: For clarity, for panels A and C-F representative experiments of three independent biological replicates are shown. For panel B a representative experiment of five independent biological replicates is shown.

| <b>target gene</b> | <b>sequence</b>              |
|--------------------|------------------------------|
| Erlin1-fwd         | 5'-CCAGAGGTACGGTTGGTTGA-3'   |
| Erlin1-rev         | 5'-CCTTCCAAGCTTCCTGGTTCA-3'  |
| Erlin2-fwd         | 5'- CTTGAGCAACGGCTGTATCC-3'  |
| Erlin2-rev         | 5'- AATCACCACCCATGGCATCAT-3' |
| Hrd1-fwd           | 5' GGCTATTTTGCACAGCACGA-3'   |
| Hrd1-rev           | 5'-CTTCCACCTGCTCCAGAACT-3'   |
| RHBDL4/RHBDD1-fwd  | 5'-TTATGGAGCACGATGGAAGGAA-3' |
| RHBDL4/RHBDD1-rev  | 5'-GAGATGGGAGCGTGGAAACT-3'   |

**Table S3.** Primers used for validation of the generated cell lines. Related to the STAR Methods.

| target gene              | sequence                                                 |
|--------------------------|----------------------------------------------------------|
| BiP                      | 5'-CCAACGCCAAGCAACCAAAG-3'<br>5'-TGCCGTAGGCTCGTTGATG-3'  |
| $\beta$ -2 microglobulin | 5'-CACGTCATCCAGCAGAGAAT-3'<br>5'-TGCTGCTTACATGTCTCGAT-3' |
| RHBDL4/RHBDD1            | 5'-GGTCGTAGAGAGCGTTCAGC-3'<br>5'-CTTGATCTCCGTTGCATGGC-3' |
| TATA-binding protein     | 5'-CCGGCTGTTTAACTTCGCTT-3'<br>5'-ACGCCAAGAAACAGTGATGC-3' |
| XBP1                     | 5'-CCTGGTTGCTGAAGAGGAG-3'<br>5'-CCATGGGGAGATGTTCTGG-3'   |

**Table S4.** Primers used for cDNA synthesis. Related to the STAR Methods.

| <b>plasmid</b>                    | <b>Source</b>                                   |
|-----------------------------------|-------------------------------------------------|
| BACE476 $\Delta$                  | gift from M. Molinari                           |
| $\gamma$ -fibrinogen wt           | gift from J. Brodsky                            |
| $\gamma$ -fibrinogen-R375W        | gift from J. Brodsky                            |
| ERdj3-GFP-3Gly                    | gift from M. Schuldinger                        |
| FLAG-Erlin1                       | gift from R. Wojcikiewicz, Pearce et al., 2007; |
| FLAG-Erlin2                       | gift from R. Wojcikiewicz, Pearce et al., 2007; |
| FLAG-RNF170                       | gift from R. Wojcikiewicz, Pearce et al., 2008  |
| 3FLAG- $\gamma$ -fibrinogen wt    | This paper                                      |
| 3FLAG- $\gamma$ -fibrinogen-R375W | This paper                                      |
| 3-FLAG-MHC-FL                     | This paper                                      |
| 3FLAG-MHC121                      | This paper                                      |
| 3FLAG-MHC202                      | This paper                                      |
| 3FLAG-MHC202-3HA                  | This paper                                      |
| 3FLAG-MHC202_IRES_GFP             | This paper                                      |
| 3FLAG-MHC202-K197N                | This paper                                      |
| 3FLAG-MHC202-N100Q-K197N          | This paper                                      |
| 3FLAG-MHC202-PP                   | This paper                                      |
| 3FLAG-MHC202-pT $\alpha$          | This paper                                      |
| 3FLAG-NHK                         | This paper                                      |
| 3FLAG-OS9                         | This paper                                      |
| 3FLAG-RI332                       | Fleig et al., 2012                              |
| 3HA-Erlin2                        | This study                                      |
| 3HA-RHBDL4                        | This paper                                      |
| 3HA-RHBDL4- $\Delta$ C            | Fleig et al., 2012                              |
| 3HA-RHBDL4-SA- $\Delta$ C         | Fleig et al., 2012                              |
| 3HA-RHBDL4- $\Delta$ VBM          | Fleig et al., 2012                              |
| 3HA-RHBDL4-G198V                  | This paper                                      |
| 3HA-RHBDL4-G202V                  | This paper                                      |
| 3HA-RHBDL4-SA                     | Fleig et al., 2012                              |

|                  |                                           |
|------------------|-------------------------------------------|
| Hrd1 ORF         | gift from E. Krüger, Steffen et al., 2010 |
| NHK ORF          | gift from R. Kopito                       |
| Myc-Erbeta       | gift from M. Hipp                         |
| Myc-Erbeta-3FLAG | This paper                                |
| Prolactin        | Fleig et al., 2012                        |
| Prolactin-KDEL   | Fleig et al., 2012                        |
| RFP-KDEL         | Altan-Bonnet et al., 2006                 |
| RHBDL4-FLAG      | This paper                                |
| RHBDL4-GFP       | Fleig et al., 2012                        |
| RHBDL4-SA-GFP    | Fleig et al., 2012                        |
| RHBDL4-G202V-GFP | This paper                                |

**Table S5.** Plasmids used in this paper. Related to the STAR Methods.
